# Supplementary material for: Boronate decorated membrane via atom transfer radical polymerization for separation and enrichment of polyphenols from tea drinks
Source: Royal Society of Chemistry journal article supplement (doi:10.1039/c9ay01229j), 2019-01-01
Supplement: c9ay01229j1.pdf [file c9ay01229j1.pdf]

### Electronic supplementary material

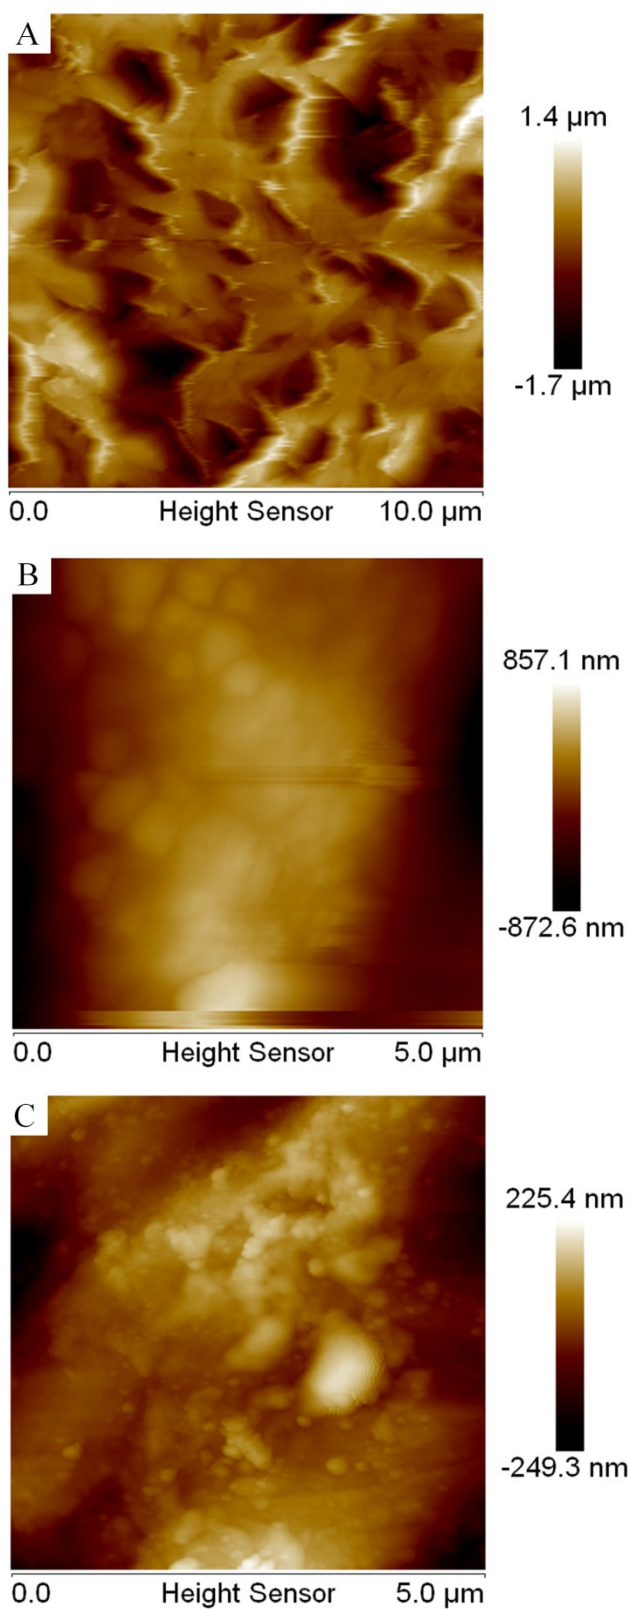

Fig. S1. Two-dimensional atomic force microscope images of nylon membrane (A), surface initiator-functional nylon membrane (B) and boronate affinity membrane (C).

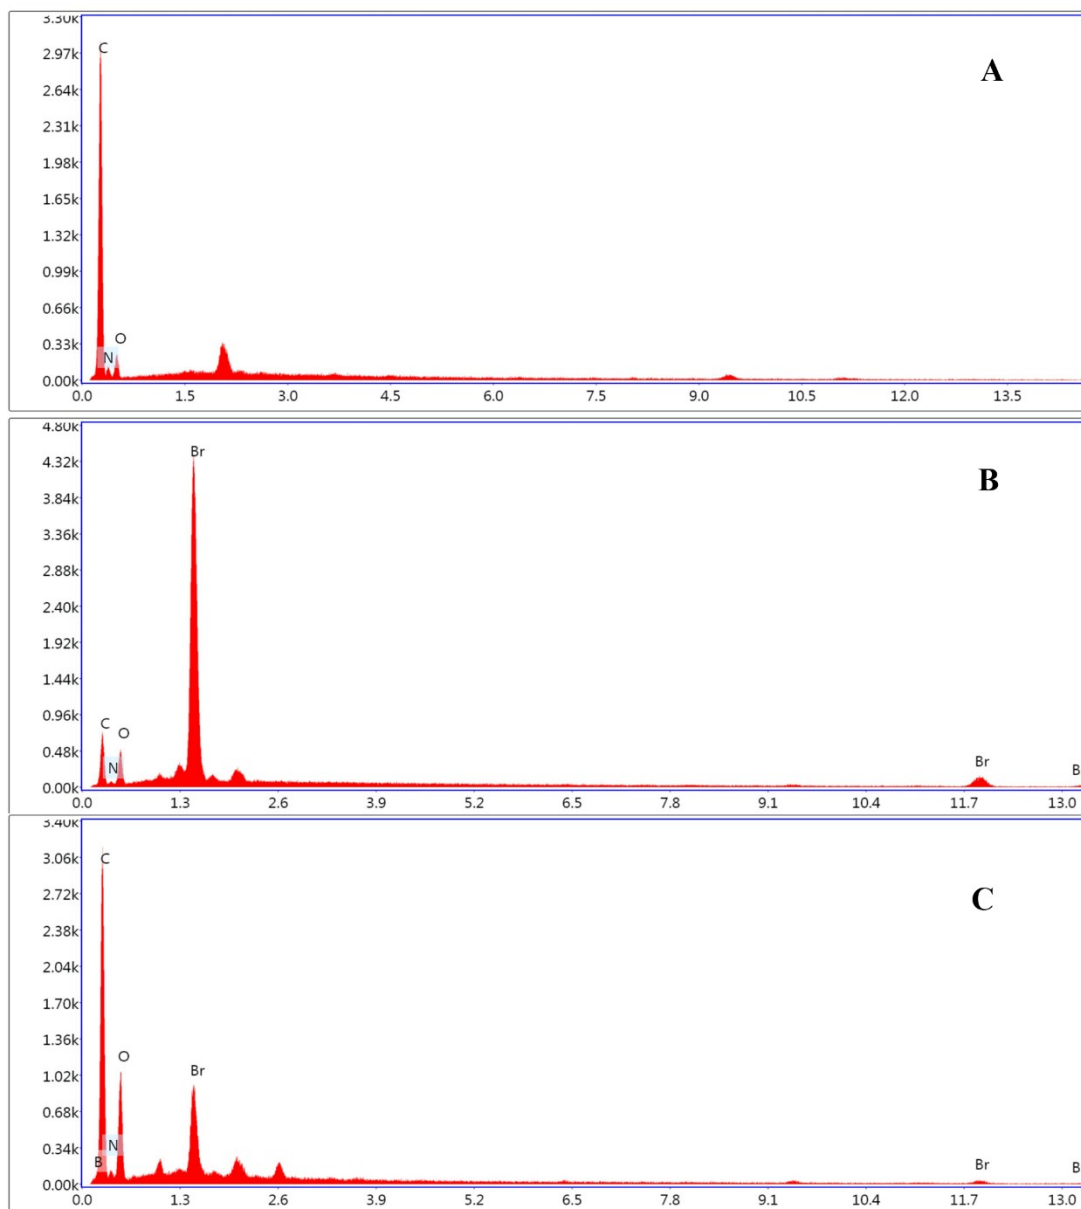

Fig. S2. Selected area SEM-EDS mapping of nylon membrane (A), surface initiator-functional nylon membrane (B) and boronate affinity membrane (C).

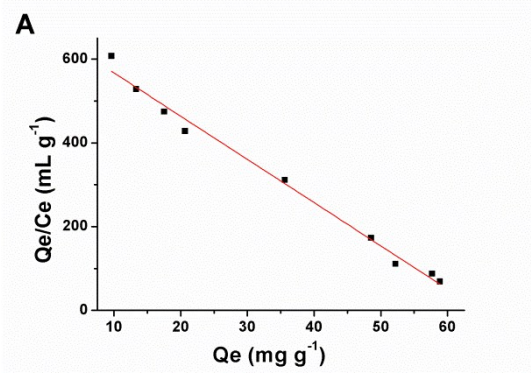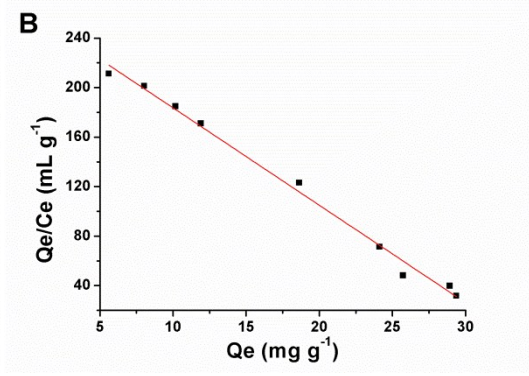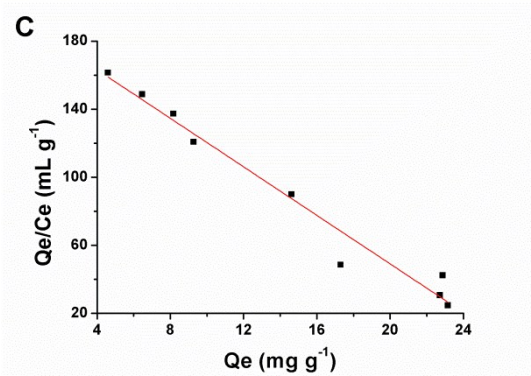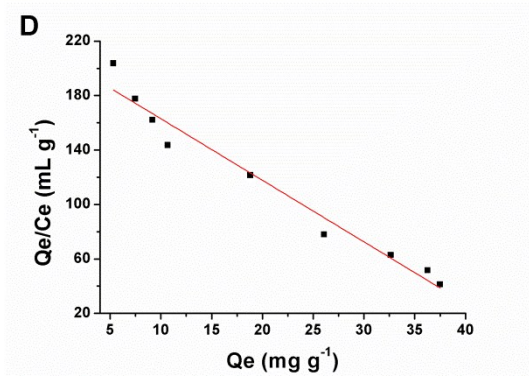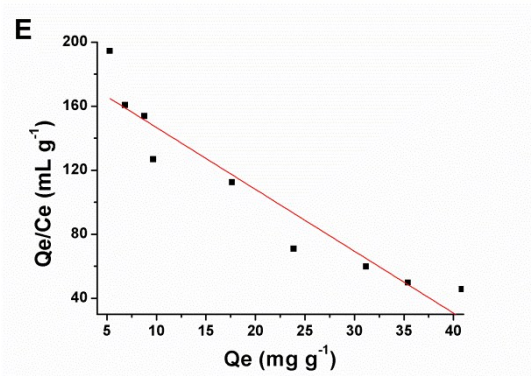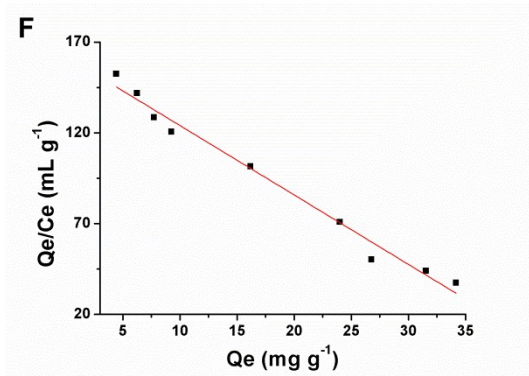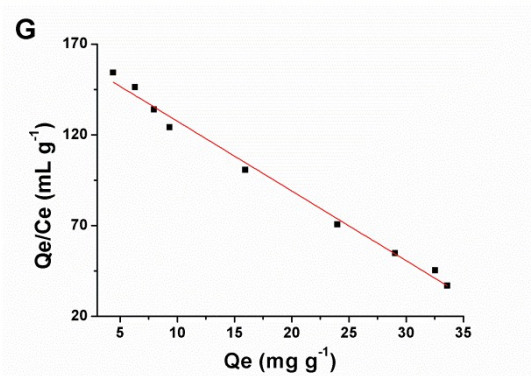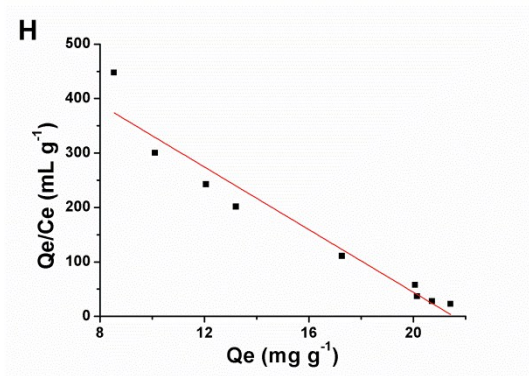

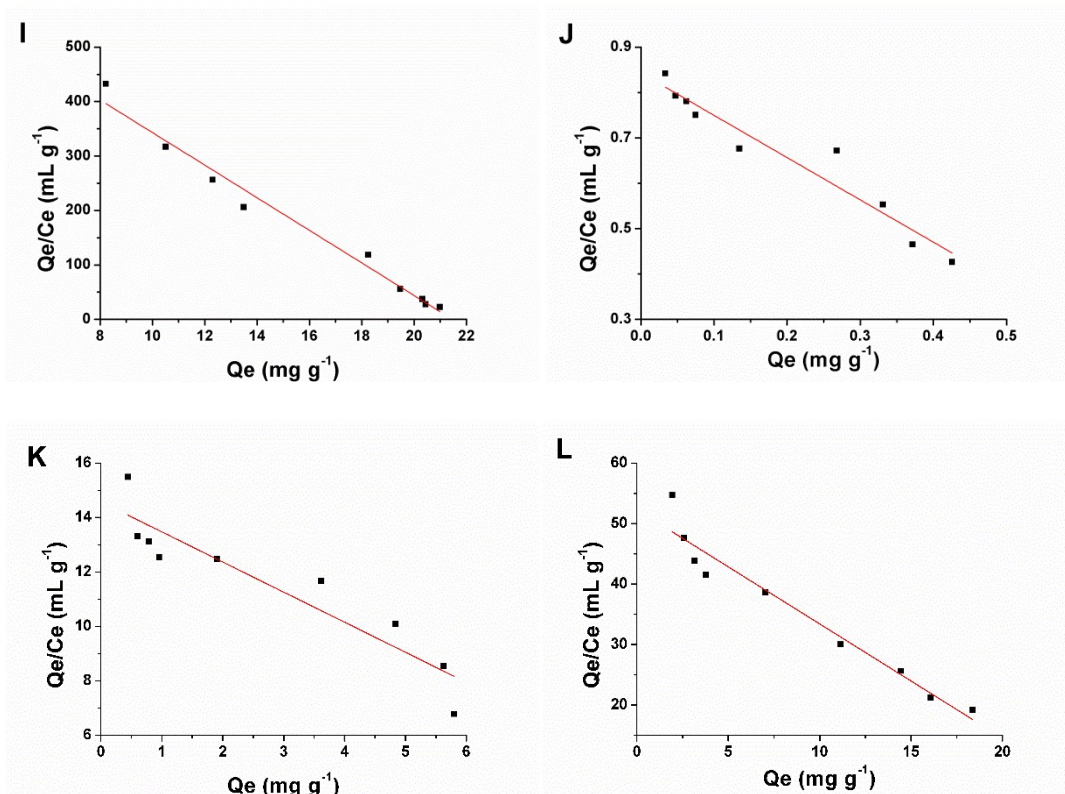

Fig. S3. Scatchard plots for binding of BA membrane with catechol (A), gallic acid (B), caffeic acid (C), luteolin (D), quercetin (E), catechin (F), epicatechin (G), chlorogenic acid (H), rosmarinic acid (I), ferulic acid (J), resorcinol (K) and kaempferol (L).

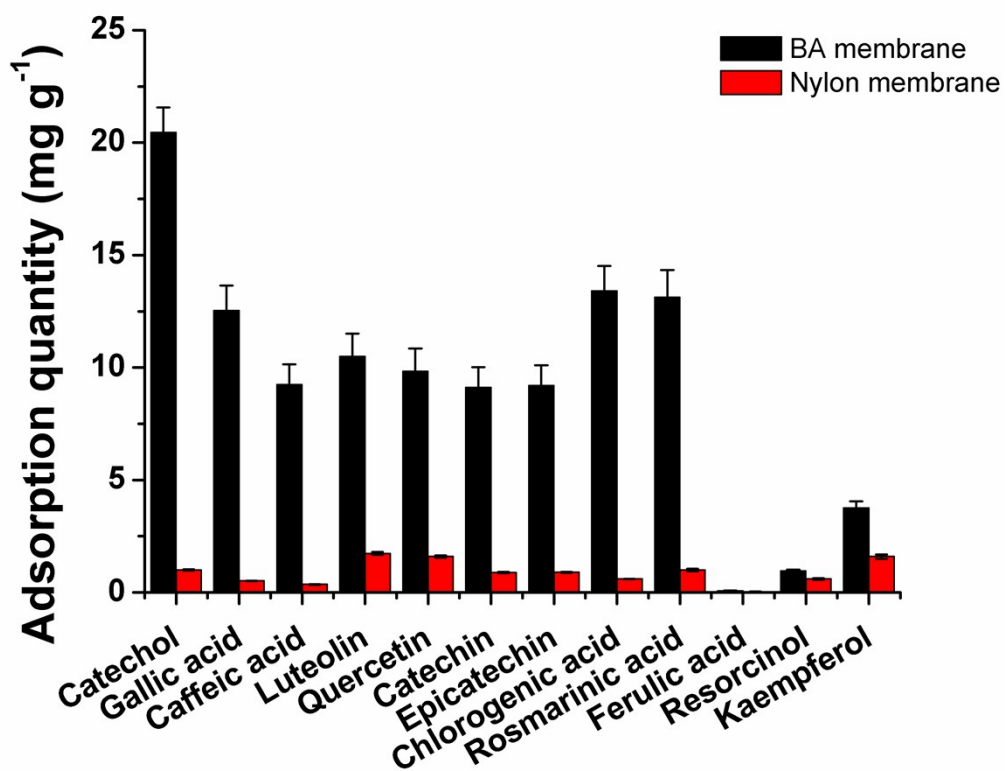

Fig. S4. The adsorption quantity of polyphenols on BA membrane and Nylon membrane. A 5.0 mg of BA membrane or Nylon membrane was used to adsorb different polyphenols in 2.0 mL of 100  $\mu\text{g mL}^{-1}$  solution.



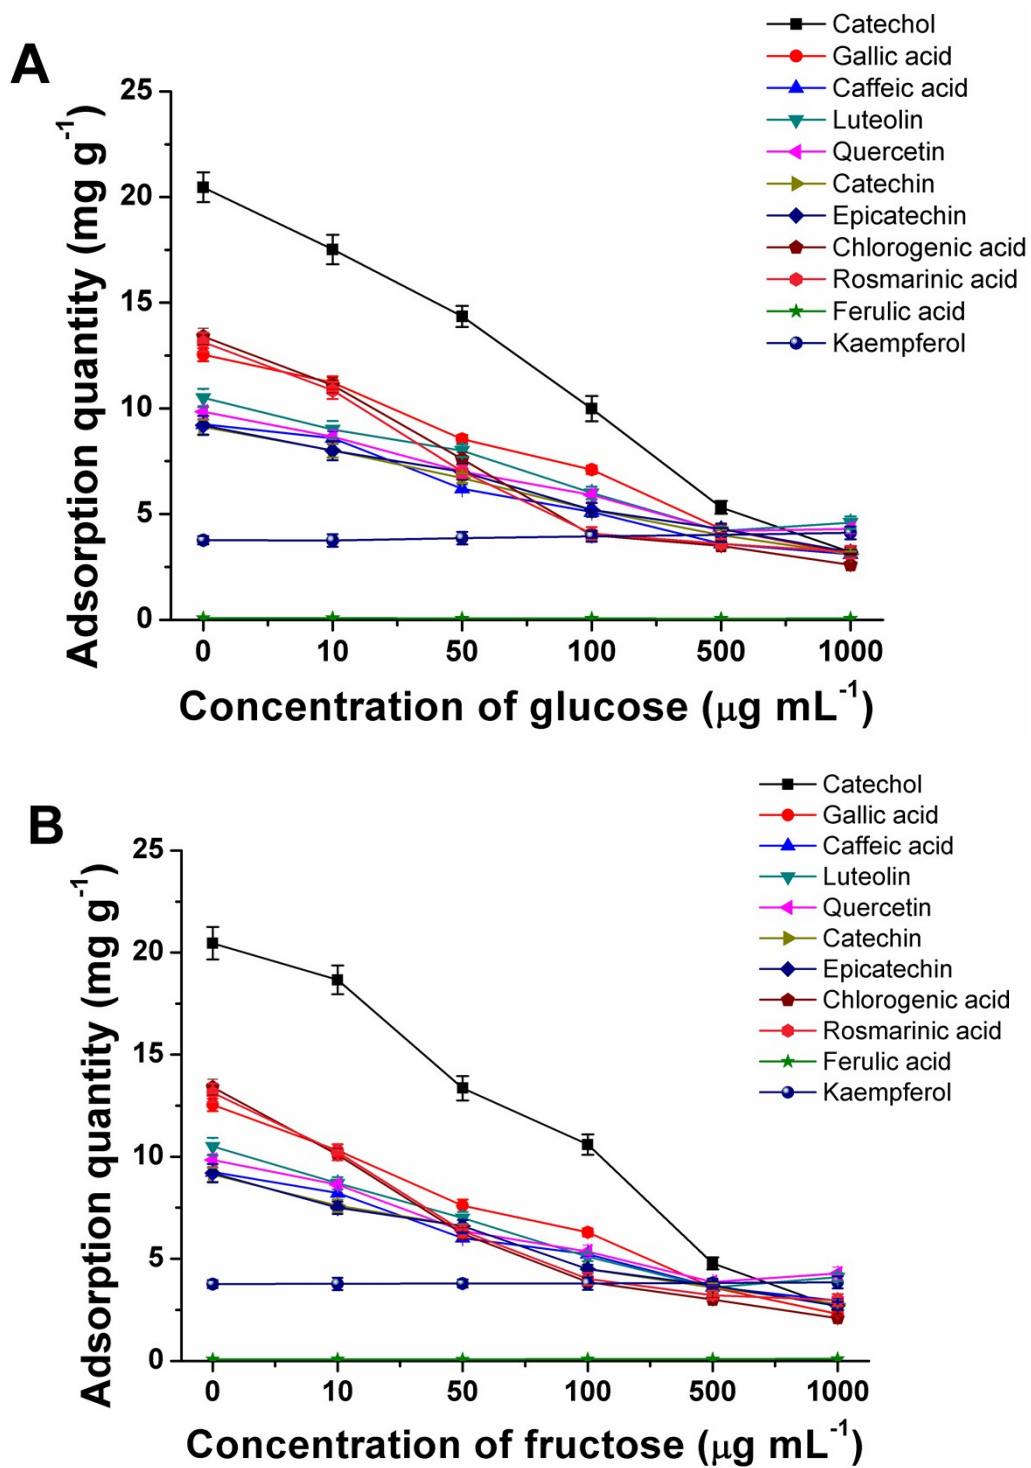

Fig. S5. Effects of glucose (A) and fructose (B) on the membrane extraction procedures.

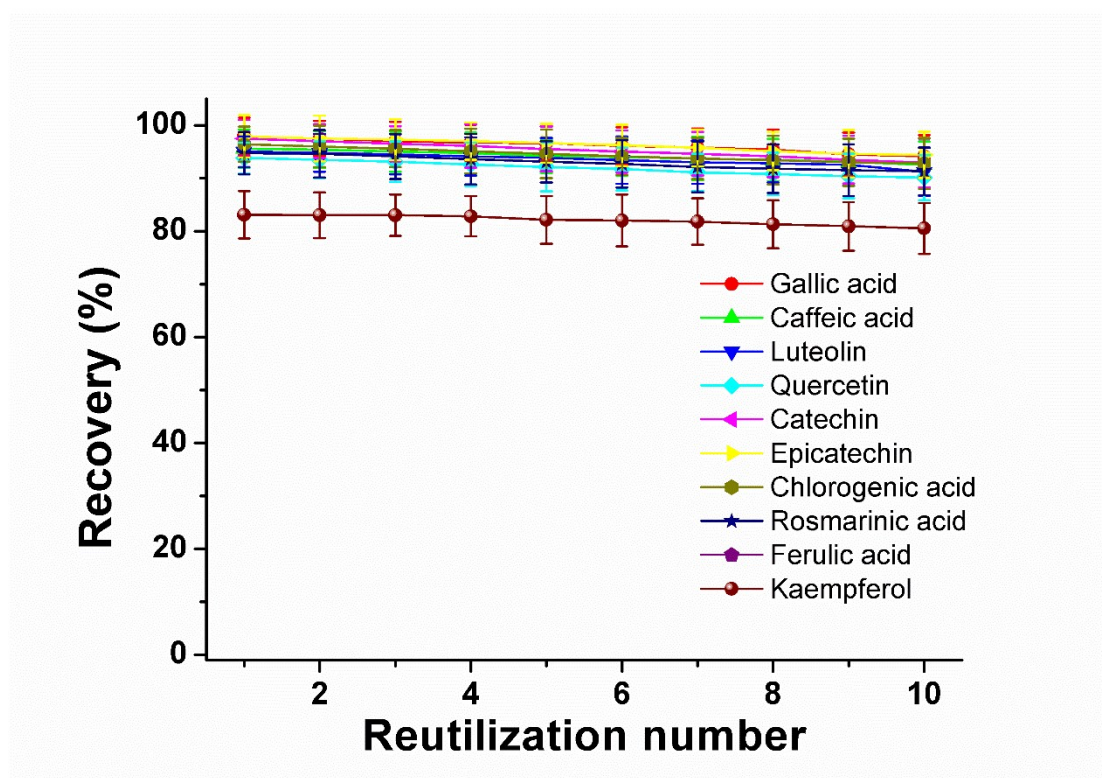

Fig. S6. Reusability of BA membrane in real sample (n=3). Sample pretreatment: 1.0 mL of tea sample with spiked concentrations at  $0.1 \mu\text{g mL}^{-1}$  was mixed with 1.0 mL of 50 mM phosphate buffer (pH 8.0); Desorption condition: 2.0 mL of TCA-methanol (3/97, v/v). The BA membrane was washed with 2.0 mL of methanol and 1.0 mL of phosphate buffer (50 mM, pH 8.0) before next use.

Table S1. The intraday, interday and batch-to- batch repeatability of BA membranes.

|                    | Binding amount of chlorogenic acid on BA membrane<br>( $\mu\text{mol g}^{-1}$ ) <sup>a</sup> |       |       |       |       | RSD<br>(%) |
|--------------------|----------------------------------------------------------------------------------------------|-------|-------|-------|-------|------------|
|                    | n=1                                                                                          | n=2   | n=3   | n=4   | n=5   |            |
| Intraday precision | 56.77                                                                                        | 56.12 | 58.78 | 57.46 | 56.82 | 0.5        |
| Interday precision | 56.77                                                                                        | 59.96 | 57.95 | 54.34 | 51.75 | 1.9        |
| Batch-to-batch     | 56.77                                                                                        | 54.69 | 59.36 | 59.74 | 54.36 | 3.9        |

<sup>a</sup> Approximately 5 mg of BA membrane was used for extracting from 2 mL of chlorogenic acid solution (pH=8.0, 500  $\mu\text{g mL}^{-1}$ ) every time.



Table S2. Chemical structure, name, log P<sub>ow</sub>, molecular volume, molecular weight and pK<sub>a</sub> of these compounds.

| Chemical structure<br>Name                                                                              | Log P <sub>ow</sub> <sup>a</sup> | Molecular<br>volume (cm <sup>3</sup><br>mol <sup>-1</sup> ) <sup>b</sup> | Molecular<br>weight <sup>b</sup> | pK <sub>a</sub> (pK <sub>a1</sub> ) |
|---------------------------------------------------------------------------------------------------------|----------------------------------|--------------------------------------------------------------------------|----------------------------------|-------------------------------------|
| 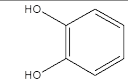<br>Catechol           | 0.88±0.20                        | 100.08                                                                   | 110.11                           | 7.12 <sup>c</sup>                   |
| <br>Gallic acid        | 0.91±0.33                        | 135.10                                                                   | 170.12                           | 4.70 <sup>d</sup>                   |
| <br>Caffeic acid       | 1.42±0.36                        | 154.50                                                                   | 180.16                           | 4.38 <sup>e</sup>                   |
| <br>Luteolin           | 2.40±0.65                        | 232.07                                                                   | 286.23                           | 6.19 <sup>f</sup>                   |
| <br>Quercetin        | 2.07±0.72                        | 240.08                                                                   | 302.24                           | 6.89 <sup>g</sup>                   |
| <br>Catechin         | 0.49±0.38                        | 244.14                                                                   | 290.27                           | 8.16 <sup>h</sup>                   |
| <br>Epicatechin      | 0.49±0.38                        | 244.14                                                                   | 290.27                           | 8.16 <sup>h</sup>                   |
| <br>Chlorogenic acid | -0.36±0.43                       | 296.27                                                                   | 354.31                           | 3.36 <sup>e</sup>                   |
| <br>Rosmarinic acid  | 1.70±0.41                        | 303.54                                                                   | 360.31                           | 2.79 <sup>g</sup>                   |
| <br>Ferulic acid     | 1.64±0.36                        | 172.03                                                                   | 194.19                           | 4.70 <sup>e</sup>                   |

|                                                                                                 |           |        |        |                   |
|-------------------------------------------------------------------------------------------------|-----------|--------|--------|-------------------|
| 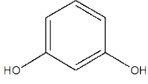<br>Resorcinol | 0.76±0.20 | 100.08 | 110.11 | 7.20 <sup>c</sup> |
| <br>Kaempferol | 2.05±0.60 | 232.07 | 286.23 | 6.93 <sup>g</sup> |

<sup>a</sup>Log P<sub>ow</sub> (octanol-water partition coefficient) was obtained by using Scifinder and calculated using ACDLabs Freeware (<http://www.acdlabs.com/home/>).

<sup>b</sup>Molecular volume and weight were calculated from software of Molinspiration (<http://www.molinspiration.com/>).

<sup>c</sup> S. Siva, G. Venkatesh, A. Antony Muthu Prabhu, R.K. Sankaranarayanan, N. Rajendiran, Absorption and fluorescence spectral characteristics of norepinephrine, epinephrine, isoprenaline, methyl dopa, terbutaline and orciprenaline drugs. *Phys. Chem. Liq.*, 2012, 50, 434-452.

<sup>d</sup> S. Pardeshi, R. Dhodapkar, A. Kumar, Molecularly imprinted microspheres and nanoparticles prepared using precipitation polymerization method for selective extraction of gallic acid from *Embllica officinalis*. *Food Chem.*, 2014, 146, 385-393.

<sup>e</sup> K. Ohara, Y. Ichimura, K. Tsukamoto, M. Ogata, S. Nagaoka, K. Mukai, Kinetic study on the free radical-scavenging and vitamin E-regenerating actions of caffeic acid and its related compounds. *Bull. Chem. Soc. Jpn.*, 2006, 79, 1501-1508.

<sup>f</sup> A. Amat, F. D. Angelis, A. Sgamellotti, S. Fantacci, Acid-base chemistry of luteolin and its methyl-ether derivatives: a DFT and ab initio investigation. *Chem. Phys. Lett.*, 2008, 462, 313-317.

<sup>g</sup> H. Shival, D. Lichtenberg, E. Gazit, The molecular mechanisms of the anti-amyloid of phenols. *Amyloid*, 2007, 14, 73-87.

<sup>h</sup> N. P. Slabbert, Ionisation of some flavanols and dihydroflavonols. *Tetrahedron*, 1977, 33, 821-824.

Table S3. Comparison of binding capacity and preparation method of the proposed BA membrane with previously reported BA materials.

| Supports                       | Preparation method                                       | Analytes  | $Q_{\max}$<br>( $\mu\text{mol g}^{-1}$ ) | Ref.      |
|--------------------------------|----------------------------------------------------------|-----------|------------------------------------------|-----------|
| Regenerated-cellulose membrane | PEI as enlarged skeleton, three-step approach            | Catechol  | 511                                      | 11        |
| Ammoniated PGMA microsphere    | SI-RAFT, three-step approach                             | Adenosine | 99.2                                     | 27        |
| Silica microsphere             | ATRP and chain-end functionalization, four-step approach | Catechol  | 513.6                                    | 28        |
| Graphene oxide                 | ATRP, four-step approach                                 | Catechol  | 1111                                     | 30        |
| Nylon 66 membrane              | ATRP, two-step approach                                  | Catechol  | 589.8                                    | This work |

Table S4. The analytical performance of UPLC for determination gallic acid, catechin, chlorogenic acid, epicatechin, caffeic acid, ferulic acid, rosmarinic acid, quercetin, luteolin and kaempferol.

| Compounds        | Lineal range<br>(ug mL <sup>-1</sup> ) | Linear equation  | <i>r</i> | LOD(ng) | LOQ<br>(ng) |
|------------------|----------------------------------------|------------------|----------|---------|-------------|
| Gallic acid      | 0.1-2.0                                | y=7352.2x+6498.7 | 0.9991   | 0.06    | 0.21        |
| Catechin         | 0.1-2.0                                | y=5538.5x+283.13 | 0.9954   | 0.18    | 0.60        |
| Chlorogenic acid | 0.1-2.0                                | Y=16520x-732.66  | 0.9978   | 0.09    | 0.24        |
| Epicatechin      | 0.1-2.0                                | Y=8025.8x+2362.4 | 0.9984   | 0.06    | 0.21        |
| Caffeic acid     | 0.1-2.0                                | Y=36442x-2141.7  | 0.9981   | 0.18    | 0.60        |
| Ferulic acid     | 0.1-2.0                                | Y=36397x-986.73  | 0.9994   | 0.06    | 0.18        |
| Rosmarinic acid  | 0.1-2.0                                | Y=16582x+9063.6  | 0.9988   | 0.12    | 0.36        |
| Quercetin        | 0.1-2.0                                | Y=40163x-1290    | 0.9993   | 0.20    | 0.60        |
| Luteolin         | 0.1-2.0                                | Y=46208x-1095.5  | 0.9989   | 0.20    | 0.60        |
| Kaempferol       | 0.1-2.0                                | Y=43449x-1213.6  | 0.9993   | 0.20    | 0.60        |

Table S5. Comparison between the proposed method and previously published methods for determination of polyphenols.

| Number of analytes <sup>a</sup> | Number of <i>cis</i> -diol-containing polyphenols (Recovery, %) <sup>a</sup> | limit of detection <sup>a</sup> | Sample pretreatment                                                                                                                | Instrument | Ref.      |
|---------------------------------|------------------------------------------------------------------------------|---------------------------------|------------------------------------------------------------------------------------------------------------------------------------|------------|-----------|
| 10                              | 8 (91.2%-100.5%)                                                             | 0.06-0.9 ng                     | Extraction of dilute tea sample with BA membrane                                                                                   | UPLC-UV    | This work |
| 15                              | 1 (94.6%)                                                                    | Not reported                    | Extraction with ether or ethyl acetate, derivatization with BSTFA+TMCS                                                             | GC-MS      | 1         |
| 11                              | 10 (Not reported)                                                            | 0.5-7.5 ng                      | Solid sample was ground and mixed with 70% aqueous methanol                                                                        | HPLC-DAD   | 2         |
| 8                               | 3 (75-80%)                                                                   | 8.6-29.0 ng <sup>b</sup>        | Extraction of stored powder with 90% methanol containing 0.5% acetic acid                                                          | HPLC-MS    | 3         |
| 7                               | 5 (63-95%)                                                                   | 1.0-3.0 ng                      | SPE of 250 mL of aqueous solution                                                                                                  | HPLC-PAD   | 4         |
| 22                              | 10 (78-100%)                                                                 | 0.25-15 ng                      | Extrusion of 1 kg of fruit for collecting juice, extraction of freeze-dried juice with methanol-water-acetic acid (30:69:1, v/v/v) | HPLC-DAD   | 5         |
| 5                               | 4 (80.9-101.5%)                                                              | 0.5-4 ng                        | In-tube SPME of juice sample                                                                                                       | HPLC-UV    | 6         |

<sup>a</sup> Data were selected from Addition and Recovery Test. <sup>b</sup>It was calculated as signal-to-noise ratio equal to 10.

#### Reference

1. Y. Zuo, C. Wang, J. Zhan, Separation, characterization, and quantitation of benzoic and phenolic antioxidants in american cranberry fruit by GC-MS, *J. Agric. Food Chem.*, 50 (2002) 3789-3794.

2. R. Tsao, R. Yang, J.C. Young, H. Zhu, Polyphenolic profiles in eight apple cultivars using high-performance liquid chromatography (HPLC), *J. Agric. Food Chem.*, 51 (2003) 6347-6353.
3. H. Sakakibara, Y. Honda, S. Nakagawa, H. Ashida, K. Kanazawa, Simultaneous determination of all polyphenols in vegetables, fruits, and teas, *J. Agric. Food Chem.*, 51 (2003) 571-581.
4. Q. Liu, W. Cai, X. Shao, Determination of seven polyphenols in water by high performance liquid chromatography combined with preconcentration, *Talanta*, 77 (2008) 679-683.
5. B. Abad-García, L.A. Berrueta, D.M. López-Márquez, I. Crespo-Ferrer, B. Gallo, F. Vicente, Optimization and validation of a methodology based on solvent extraction and liquid chromatography for the simultaneous determination of several polyphenolic families in fruit juices, *J. Chromatogr. A*, 1154 (2007) 87-96.
6. L.L. Ying, D.Y. Wang, H.P. Yang, X.Y. Deng, C. Peng, C. Zheng, B. Xu, L.Y. Dong, X. Wang, L. Xu, Y.W. Zhang, X.H. Wang, Synthesis of boronate-decorated polyethyleneimine-grafted porous layer open tubular capillaries for enrichment of polyphenols in fruit juices, *J. Chromatogr. A* 1544 (2018) 23-32.
